RESEARCH ARTICLE

# Aromatic amino acids in the cellulose binding domain of *Penicillium crustosum* endoglucanase EGL1 differentially contribute to the cellulose affinity of the enzyme

Jiang-Ke Yang\*, Wei Xiong, Fang-Yuan Chen, Li Xu, Zheng-Gang Han

College of Biology and Pharmaceutical Engineering, Wuhan Polytechnic University, Wuhan, China

\* [jiangke.yang@gmail.com](mailto:jiangke.yang@gmail.com)

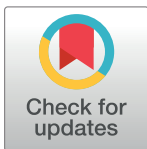

**OPEN ACCESS**

**Citation:** Yang J-K, Xiong W, Chen F-Y, Xu L, Han Z-G (2017) Aromatic amino acids in the cellulose binding domain of *Penicillium crustosum* endoglucanase EGL1 differentially contribute to the cellulose affinity of the enzyme. PLoS ONE 12(5): e0176444. <https://doi.org/10.1371/journal.pone.0176444>

**Editor:** Israel Silman, Weizmann Institute of Science, ISRAEL

**Received:** December 6, 2016

**Accepted:** April 10, 2017

**Published:** May 5, 2017

**Copyright:** © 2017 Yang et al. This is an open access article distributed under the terms of the [Creative Commons Attribution License](https://creativecommons.org/licenses/by/4.0/), which permits unrestricted use, distribution, and reproduction in any medium, provided the original author and source are credited.

**Data Availability Statement:** All relevant data are within the paper.

**Funding:** There has been no significant financial support for this work that could have influenced its outcome. This work was granted by Wuhan Science and Technology Project (No. 2016020101010084), China.

**Competing interests:** The authors have declared that no competing interests exist.

## Abstract

The cellulose binding domain (CBD) of cellulase binding to cellulosic materials is the initiation of a synergistic action on the enzymatic hydrolysis of the most abundant renewable biomass resources in nature. The binding of the CBD domain to cellulosic substrates generally relies on the interaction between the aromatic amino acids structurally located on the flat face of the CBD domain and the glucose rings of cellulose. In this study, we found the CBD domain of a newly cloned *Penicillium crustosum* endoglucanase EGL1, which was phylogenetically related to *Aspergillus*, *Fusarium* and *Rhizopus*, and divergent from the well-characterized *Trichoderma reesei*s cellulase CBD domain, contain two conserved aromatic amino acid-rich regions, Y<sub>451</sub>-Y<sub>452</sub> and Y<sub>477</sub>-Y<sub>478</sub>-Y<sub>479</sub>, among which three amino acids Y<sub>451</sub>, Y<sub>477</sub>, and Y<sub>478</sub> structurally sited on a flat face of this domain. Cellulose binding assays with green fluorescence protein as the marker, adsorption isotherm assays and an isothermal titration calorimetry assays revealed that although these three amino acids participated in this process, the Y<sub>451</sub>-Y<sub>452</sub> appears to contribute more to the cellulose binding than Y<sub>477</sub>-Y<sub>478</sub>-Y<sub>479</sub>. Further glycine scanning mutagenesis and structural modelling revealed that the binding between CBD domain and cellulosic materials might be multi-amino-acids that participated in this process. The flexible poly-glucose molecule could contact Y<sub>451</sub>, Y<sub>477</sub>, and Y<sub>478</sub> which form the contacting flat face of CBD domain as the typical model, some other amino acids in or outside the flat face might also participate in the interaction. Thus, it is possible that the conserved Y<sub>451</sub>-Y<sub>452</sub> of CBD might have a higher chance of contacting the cellulosic substrates, contributing more to the affinity of CBD than the other amino acids.

## Introduction

Cellulosic materials are the most abundant renewable biomass resources in nature. These cellulosic materials can be enzymatically hydrolysed into sugars by cellulases and then fermented into cellulosic ethanol and other cellulose-based biofuels, which are important alternative energy sources for reducing environmental pollution and ensuring the security of energy

sources [1, 2]. Due to their critical function in the bioconversion of cellulosic materials, cellulases have deeply allured the interest of researchers. Currently, many cellulases have already been cloned and characterized genetically and biochemically, and this pace of progress is continuously accelerating [3].

Although the enzyme size, organization and location of the functional domains of cellulase and related enzymes are diverse, typically, cellulases comprise three parts, a catalytic domain (CD), a cellulose binding domains (CBD), and a linker region between them. The CD domain is responsible for the hydrolysis of cellulose, and the CBD mediates the binding of the enzyme to cellulose; thus, cellulase has evolved as a modular enzyme. The hydrolysis activity of cellulose is generally dependent on the CBD domain, which could adsorb to the matrix cellulose and endorse the catalytic domain to exert its cellulose degradation capacity [4–8].

Currently, the CBDs were generally classified into 13 families. The average size of the members of different families is in the range from 36 to 200 amino acids. Most of the reported CBDs belong to families I, II, and III. Family I CBDs are compact polypeptides of 32–36 residues and are found only in fungi, and the majority of the fungal cellulose also belongs to this family I [3, 9]. In this family, the structure and function of CBD from *Trichoderma reesei* are well characterized and used as a model to study cellulose binding. As revealed by studies on *T. reesei* CBD, a contacting flat 3-D structure of CBD exists to absorb the cellulose fibre. In this contacting face, three aromatic amino acids are important for the binding of CBD to cellulose through the interaction between the aromatic amino acid and the glucose ring unit of cellulose molecules [7, 10]. However, to date, questions have arisen, such as whether these aromatic amino acids contribute equally to the binding capacity of the CBD domain or whether other aromatic amino acids in the CBD participate in cellulosic substrate binding.

In this study, we cloned the endoglucanase gene EGL1 from the *Penicillium crustosum* strain 624. Phylogenetic analysis of the CBD sequence revealed that the EGL1 CBD is divergent from the well-characterized *T. reesei* CBD domain. We systematically studied the role of aromatic amino acids in CBD binding affinity by the methods of glycine scanning mutagenesis, cellulose-binding assays with green fluorescence protein as the marker, adsorption isotherm assays, and isothermal titration calorimetry assays, and found these amino acids differentially contributed to CBD binding on the cellulosic substrates. Additionally, a possible explanation of these differences based on the structure modelling of CBD was also presented.

## Materials and methods

### Fusion expression of eGFP and the CBD domain

The linker region and CBD domains of EGL1 were fusion expressed with eGFP in this study. Overlap extension PCR was conducted to construct the eGFP-linker-CBD complex. First, the eGFP and Linker-CBD domains were amplified by the primer pairs GFPF (5' -GAATTCA TGGTGAGCAAGGGCGAG-3', *EcoR* I) and LinkR (5' -GACGAGCTGTACAAGACTGCCTCTA CCCCTG-3'), and LinkF (5' -CAGGGGTAGAGGCAGTCTTGTACAGCTCGTC-3') and CBDR (5' -CTCGAGTTAGTTGACACACTGGTAG-3', *Xho* I). Then, equal amounts of eGFP and linker-CBD fragments were mixed as the template and amplified with the out-primer pairs GFPF/CBDR to obtain the fragment eGFP-linker-CBD. The eGFP-linker-CBD fragment was double-digested with *EcoRI/XhoI* and then was inserted into pET-28a to obtain the plasmid pET-eGFP-linker-CBD. The eGFP gene alone was cloned into pET-28a using the *EcoRI/XhoI* sites to obtain the recombinant pET-eGFP as the control (Fig 1A).

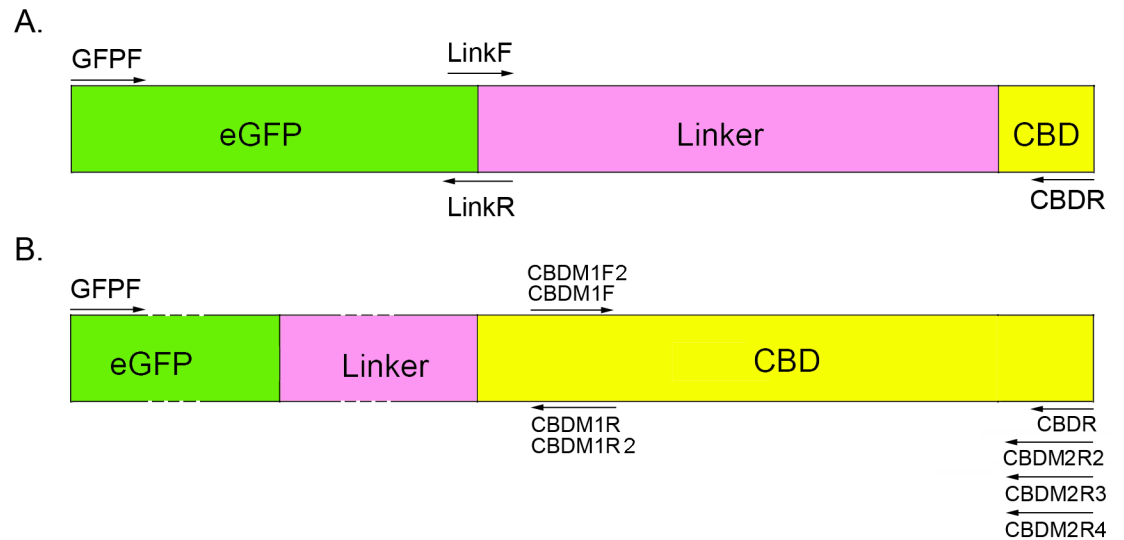

**Fig 1. Schematic representation of the fusion expression of eGFP-Linker-CBD and the CBD mutant constructs.**

<https://doi.org/10.1371/journal.pone.0176444.g001>

### Glycine scanning mutagenesis of the aromatic amino acid-rich motifs of CBD

The glycine scanning mutagenesis strategy was used to assess the function of the aromatic amino acid-rich motifs of the EGL1 CBD domain. Six primers pairs CBDM1F (5' -GCTAAGCACGGCGTACAGTGC-3'), CBDM1F2 (5' -GCTAAGCACGGCGGCCAGTGC-3'), CBDM1R (5' -GCACTGGCCGCCGTGCTTAGC-3'), CBDM1R2 (5' -GCACTGGCCGTAGTGCTTAGC-3'), CBDM2R3 (5' -CAAGCTTTAGTTGACACACTGGCCGCCGCCACCGTTCTGC-3'), and CBDM2R2 (5' -CAAGCTTTAGTTGACACACTGGTAGCCGTAACCGTTCTGC-3'), CBDM2R4 (5' -CAAGCTTTAGTTGACACACTGGCCGTAGTAACCGTTCTGC-3') which target three aromatic amino acid-rich motifs, were designed (Fig 1B). An overlap extension PCR process as schematized by Fig 1B was used to construct a series of mutants of the amino acids in the CBD domain. The PCR procedure and conditions referenced the protocol by Ho et al. [11]. The PCR products were sequenced to ensure the correct mutation and then were inserted into the expression vector pET-28a and transferred into *E. coli* to obtain the mutants.

### Inducible expression and purification of the proteins in *E. coli*

The eGFP-CBD fusion proteins were expressed in *E. coli* BL21 (DE3) cells in this study. Five to six *E. coli* colonies were selected into 10 ml of LB medium containing 50 µg/ml kanamycin and were grown at 37°C for 8 h. These seed cells were then inoculated into 100 mL of LB medium containing 50 µg/ml kanamycin at a 1/50 ratio and were incubated at 37°C in a thermostatic rotator with a 180-rpm agitation rate until the OD<sub>600</sub> of the cells reached 0.5–0.6. Then, IPTG was added into the liquid with a final concentration of 100 µmol/l followed by incubation at 20°C for approximately 16 h for the inducible expression of the proteins. Cells were collected and re-suspended with 25 ml of lysis buffer (20 mM Tris-HCl pH 7.5, 100 mM NaCl, 0.5% NP-40, 0.1 mM DTT) and then were disrupted by a frenchpress. The protein lysis was centrifuged at 12000 rpm for 10 min to remove the unresolved pellets, and then, protein purification

was performed using imidazole gradient elution in a Ni-column (GE Healthcare, Piscataway, NJ).

### Cellulose binding assays

Approximately 0.05 g of filter paper (Whatman) or microcrystalline cellulose (Avicel, FMC Biopolymer, Philadelphia, PA) were washed with 1 mL of binding buffer (10 mM Tris-HCl pH 7.5, 2% BSA) twice, followed by submerging in 200  $\mu$ l of binding buffer. Approximately 50  $\mu$ g of protein were added to the binding mixture and then was incubated on ice for 5 min. The liquid was discarded by centrifugation, and then the sample was washed twice with washing buffer (10 mM Tris-HCl pH 7.5) to remove the unbound protein. Then, the filter paper fibre (or microcrystalline cellulose) was suspended in 50  $\mu$ l of the washing buffer for fluorescence observation under confocal microscopy (LEICA TCS SP2).

### Adsorption isotherm assay of the binding of CBD and the mutants on cellulose substrate

Approximately 0.1 g microcrystalline cellulose were washed with binding buffer (20 mM Tris-HCl pH 7.5, 50 mM), and then suspended in 1 mL of binding buffer. A series of concentration of CBD and mutants protein were added to the binding mixture and then was incubated for 30 min. After that, the mixture was centrifuged and the protein content in the supernatant was measured. The absorbed protein on the cellulosic substrate was calculated by deduced the original protein with the absorbed amount.

### Isothermal titration calorimetry assay of the binding of CBD on a cellulose substrate

Protein samples were calculated using a nanospectrophotometer (Biofuture MD2000d) to keep the concentration in the range of 0.018–0.024 mM. Approximately 2 mg of cellopentose (Seikagaku Biobusiness Corporation) were dissolved in 2 ml of protein buffer (20 mM Tris-HCl pH 7.5, 50 mM NaCl) to obtain a 2.413 mM substrate stock solution, which was then 10-fold diluted to the final concentration of 0.241 mM as the working solution. Isothermal titration calorimetry was conducted on a Thermo VP-ITC machine. Approximately 10  $\mu$ l of the cellopentose solution were titrated into 1.43 ml of the protein solution in the sample cell per 180 s with a total of 25 drops. The heat of the dilution of cellopentose was determined by titrating the buffer into the protein sample. The reaction heat was obtained by deducing the dilution heat. The corrected data were fitted using a nonlinear least square-fitting algorithm with Origin 7.5 (MicroCal company) using the variables of stoichiometry ( $n$ ), heat ( $H$ ) and entropy ( $S$ ) of the reaction, and the association constant ( $K_a$ ) was recorded.

### Structural simulation of the CBD domain

A homology model of the three-dimensional structure of the catalytic domain (glucanase) was generated using SWISS-MODEL [12] with the family 1 carbohydrate-binding module from *Trichoderma reesei* Cel7A (PDB code: 2MWK) as the template, which is 63% identical to the CBD domain of *P. crustosum* endoglucanase EGL1 [13]. The model quality was assessed using the MolProbity server [14] with a MolProbity score of 2.77. The figures were prepared with PyMOL (Schrödinger, Cambridge, MA).



## Results and discussion

### Phylogeny assay on the CBD domains from *P. crustosum* and related species

Cellulose is a homopolymer of cellobiose repeat units, the structure is the composition of highly ordered and compact arrangement of  $\beta$ -1, 4-glycosidic bonds [1, 2]. The hydrolysis of cellulose is a synergistic action by a series of enzymes collectively named cellulase. Generally, endoglucanase (EC 3.2.1.4) is the first enzyme to participate in this process. It can act on the amorphous regions and randomly cut internal sugar chains, resulting in reducing or nonreducing cellooligosaccharide ends. Cellobiohydrolases (EC 3.2.1.91) continued to hydrolyse the end of these chains and produced the major product cellobiose pond. Finally,  $\beta$ -glucosidase further processively hydrolysis of cellobiose to glucose [2].

Since 1986, when Tilbeurgh digested a *T. reesei* cellulase by papain and found it contains two domains, a catalytic domain (CD) which responded for the hydrolysis of cellulose, and a cellulose binding domains (CBD) that mediated the binding of the enzyme to cellulose, a typical cellulase was structurally regarded as containing the CD domain, CBD domain and the linker region between them [5–8]. The hydrolysis activity of endoglucanase was generally dependent on the CBD domain which could bind on the cellulosic substrates by an interaction between the aromatic amino acids (Try, Phe, Tyr) in the CBD domain and the glucose ring unit of the cellulose molecules, which endorsed the endoglucanase to begin the first step of cellulose degradation process [5, 8].

The newly cloned *P. crustosum* endoglucanase EGL1 (483 amino acids) contains a catalytic domain, a linker region and a CBD domain. A multialignment analysis of the *P. crustosum* endoglucanase EGL1 CBD and reference sequences found that there were two aromatic-amino-acid-rich regions (I and II) in the CBD domain. The number of aromatic amino acids in regions I and III changed from one to three. In the *P. crustosum* EGL1 CBD domain, regions I and II contained  $-Y_{451}Y_{452}-$ , and  $-Y_{477}Y_{478}Y_{479}-$ , respectively (Fig 2A).

The phylogeny assay based on the sequence of the CBD domain from *Penicillium* and related fungi revealed that these CBD domains could be divided into two clusters, cluster I and cluster II (Fig 2B). Cluster I was grouped with cellulase from *Trichoderma*, *Neolentinus*, *Schizopora*, *Phanerochaete* and *Agaricus*, etc. The CBD domains from *Penicillium*, *Aspergillus*, *Fusarium*, and *Rhizopus* were grouped into cluster II. Members of this group were frequently used in the food, feed and pharmaceutical industries or as pathogens that are broadly dispersed in nature. This cluster was phylogenetically divergent from the well-characterized and frequently used *T. reesei* cellulase (Fig 2B). Considering their phylogenetic divergence from the Cluster I, in which *T. reesei* was generally regarded as a model, it is possible that cloned endoglucanase from *Penicillium* might be a representative of the members in cluster II.

### The CBD domain improves *P. crustosum* endoglucanase EGL1 binding to the cellulose substrates

The physical contact between the CBD domain and the cellulose substrate was the prerequisite for cellulase to hydrolyse the cellulosic materials. In most cases, only the whole enzyme containing the CBD domain could exert its full catalytic capacity. When the CBD domain was removed, the catalytic activity of the enzyme on the cellulosic substrate was markedly decreased [15, 16]. We initially assessed the cellulose binding capacity of the CBD domain of *P. crustosum* endoglucanase EGL1. The CBD domain was fusion expressed with the reporter gene eGFP (eGFP-CBD), and the cellulose-binding capacity of the CBD was evaluated by tracking the fluorescence intensity of GFP under a fluorescence microscope. As

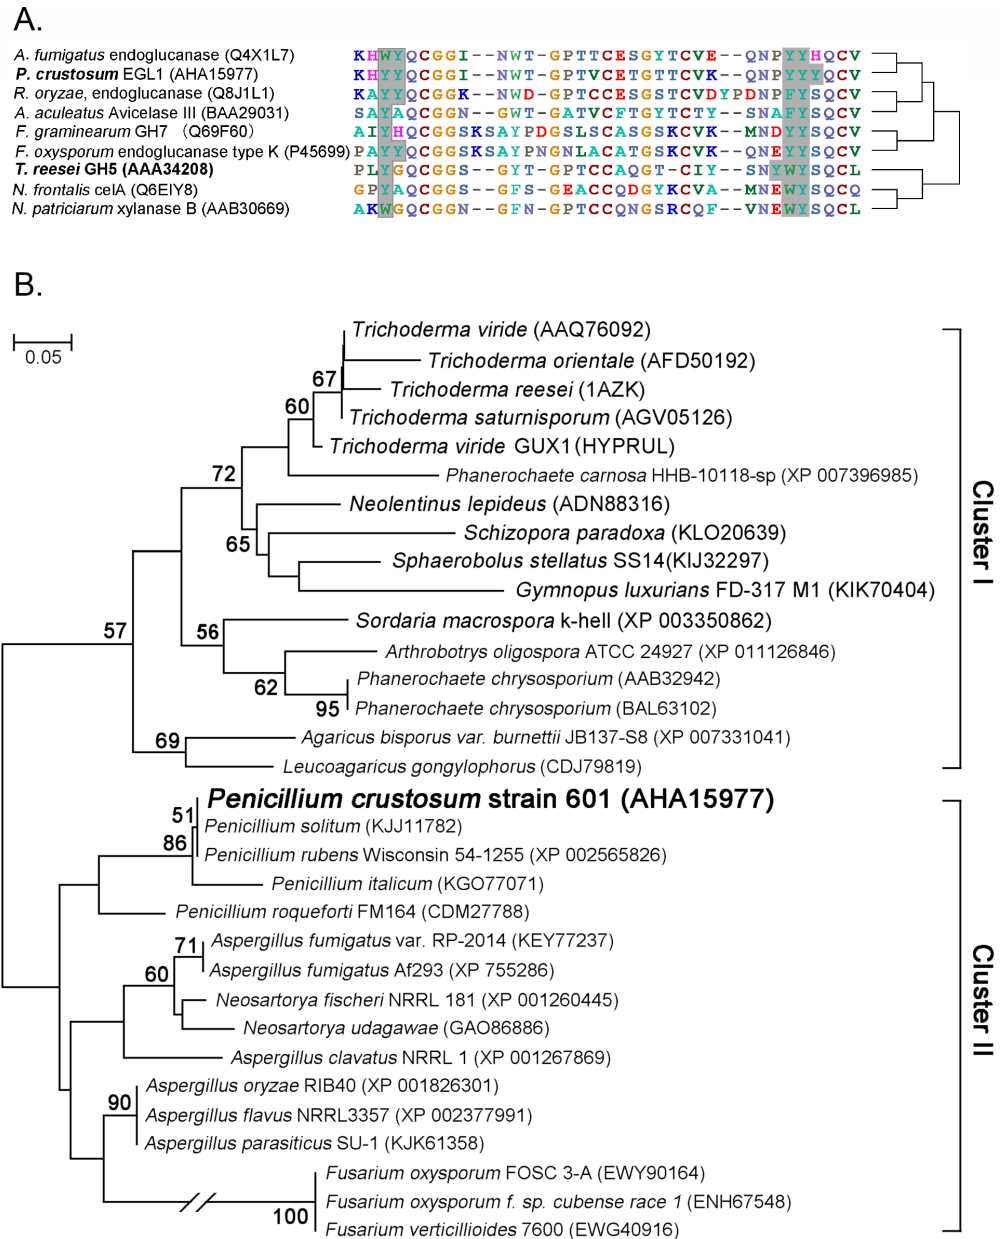

**Fig 2.** Sequence alignment (A) and phylogeny analysis (B) of the CBD domain of *P. crustosum* endoglucanase EGL1 and the related fungi. The phylogenetic analysis was performed by a molecular evolutionary genetics analysis using MEGA4 software [19]. The evolutionary relationship was analysed by the neighbour-joining method according to the Kimura 2-parameter model [20]. Bootstrap values >50 are given at the branching. The solid-line box indicates the aromatic amino acids in three motifs.

<https://doi.org/10.1371/journal.pone.0176444.g002>

shown in Fig 3, the CBD domain could efficiently bind the filter paper fibre as the integral optical intensity of GFP-CBD reached IDO = 37.8 (Fig 3A and 3B), which was significantly higher than that of the control (GFP protein alone) (Fig 3C and 3D). Thus, we concluded that the CBD domain of cloned *P. crustosum* endoglucanase EGL1 holds its biological capacity to bind to the cellulose materials.

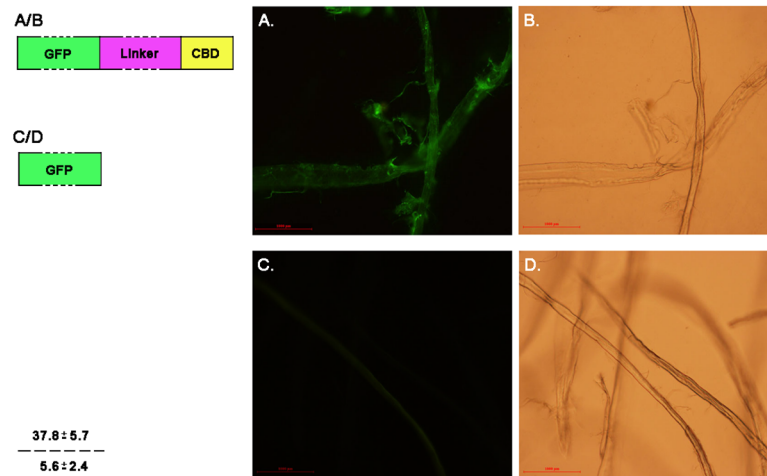

**Fig 3. Cellulose binding experiments of the CBD domain of *P. crustosum* endoglucanase EGL1.** The CBD domains of EGL1 were fusion expressed with eGFP as the marker. eGFP protein was used as a control. A. Protein eGFP-Linker-CBD bound to the filter paper that was under fluorescence excitation; B. Protein eGFP-Linker-CBD bound to the filter paper that was under fluorescence excitation; C. Protein eGFP under fluorescence excitation; D. eGFP protein under white light.

<https://doi.org/10.1371/journal.pone.0176444.g003>

### Cellulose binding assays of the CBD domain mutants

For most of the fungi cellulases, the binding of the CBD domain to the cellulosic substrates occurred through an interaction between the aromatic amino acids (Try, Phe, Tyr) in the CBD domain and the glucose ring unit of the cellulose molecules, improving the activity of the cellulase [7, 9]. As shown by previous studies on *T. reesei* cellulase, three aromatic amino acids, whose site is on the flat face of the three-dimensional structure of CBD, contributed to the contact of the substrates [17]. By analysing functionally conserved amino acid sequences of the *P. crustosum* EGL1-related CBD sequence, it can be inferred that the amino acids Y<sub>451</sub>, Y<sub>477</sub> and Y<sub>478</sub> might be located on the flat face of the *P. crustosum* EGL1 CBD domain. To facilitate the observations, we fusion expressed the mutated CBD with eGFP as a marker. Filter paper fibre and microcrystalline cellulose were used as the substrates, and a comparative analysis of the affinity of these mutants to the substrates was conducted according to the fluorescence intensity (Figs 4 and 5). As coincided with previous report [17], mutagenetic assay of the three amino acids revealed that these three aromatic amino acids contributed to the CBD domain binding on cellulosic materials (Fig 4B, 4C and 4E; Fig 5B, 5C and 5E). The fluorescence intensity declined from the original 36.0 to 32.5, 24.6 and 17.8 on filter paper fiber, and from 35.8 to 33.6, 25.4, and 22.6 on microcrystalline cellulose substrate, respectively (Figs 4 and 5).

We also noticed that several aromatic amino acids site around Y<sub>451</sub>, Y<sub>477</sub> and Y<sub>478</sub> to formed two aromatic amino acids rich region in CBD. Thus, it remains questionable whether these motifs contribute equally to the affinity of CBD to the substrates and whether other aromatic amino acids in the same region participate in the binding to the substrate. To study the aromatic amino acids in the respective region or determine whether the synergy of regions I and II have a more important effect on the binding with the substrate, glycine scanning mutagenesis of the aromatic amino acid rich motif of CBD was used. Additionally, a series of mutants was constructed as shown in Fig 4A. As shown in Figs 4 and 5, the difference in the affinity of the cellulosic materials among the original CBD protein and mutants was observed. The original CBD domain showed the strongest affinity to both filter paper fibre and microcrystalline cellulose, with the highest fluorescence intensity among all the proteins, and the integral

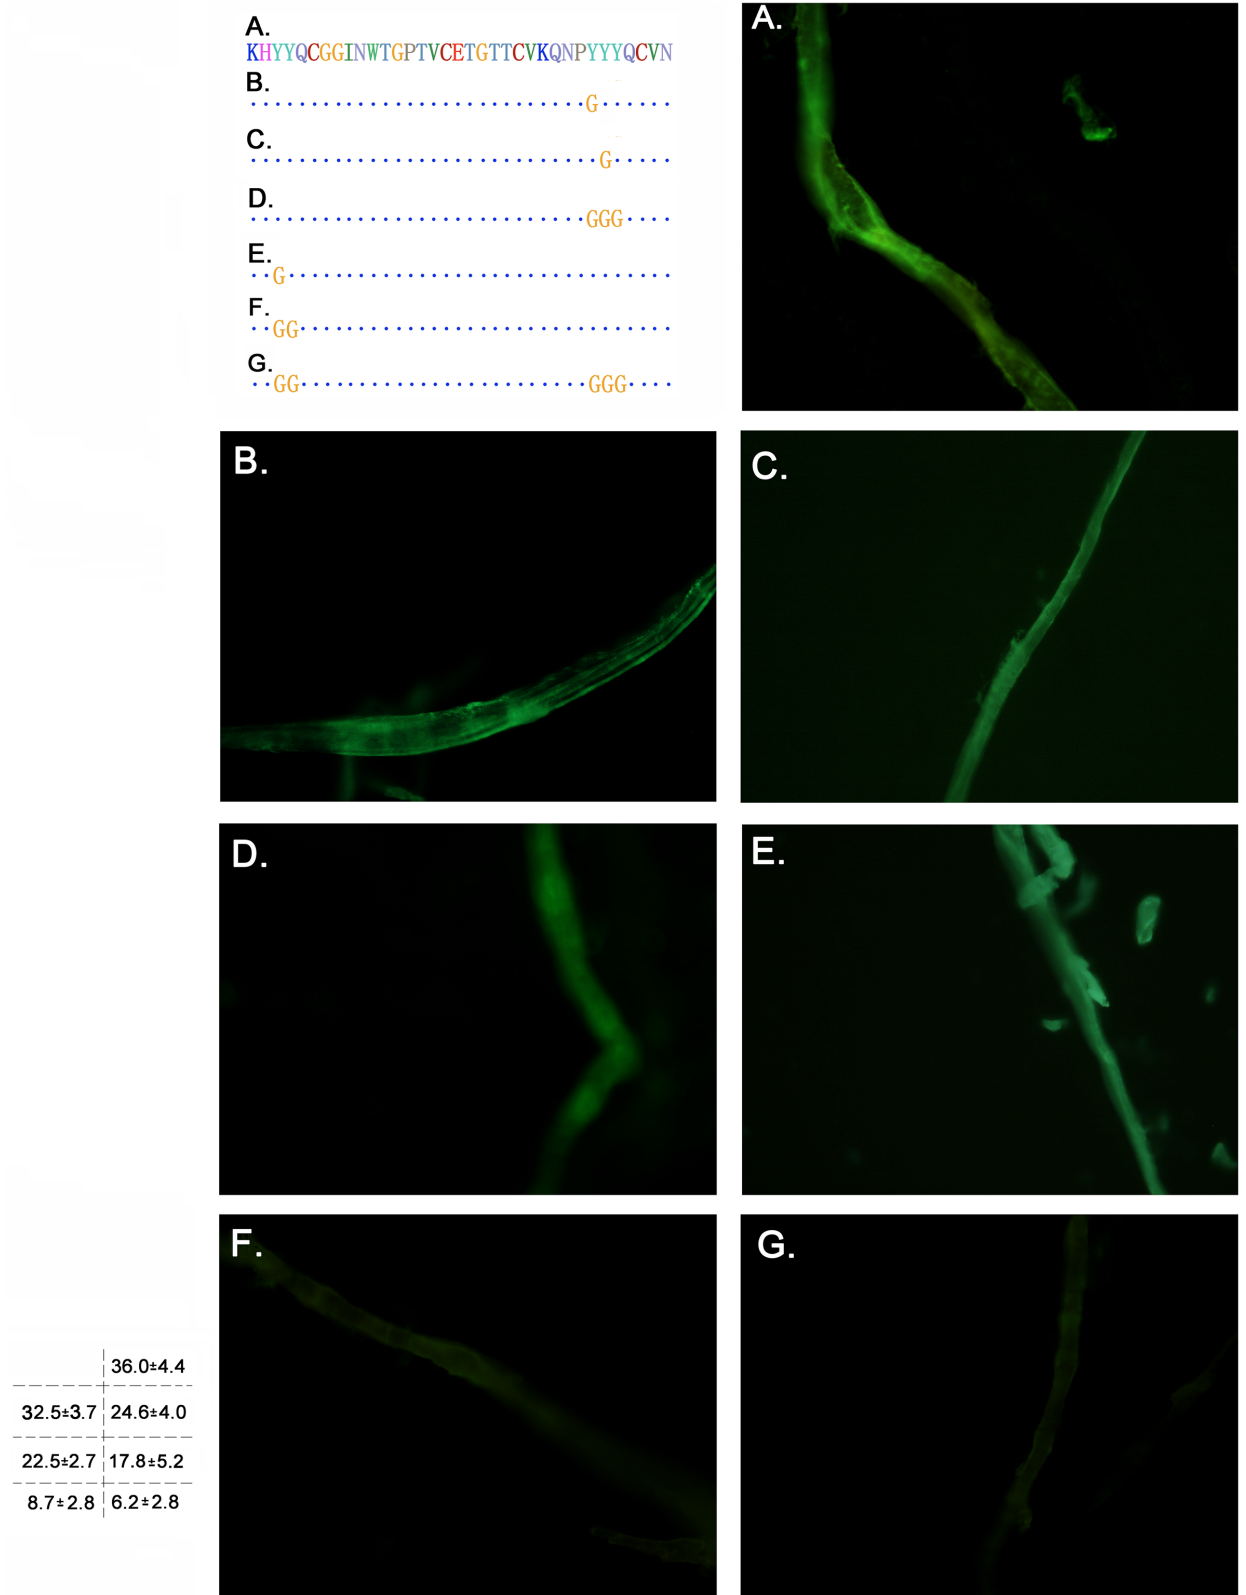

**Fig 4. Cellulose binding assays of the CBD mutants on the filter paper fibre.** The amino acid sequence is indicated on the left, with the mutated residues marked in yellow. A. eGFP-Linker-CBD; B. eGFP-Linker-CBD(Y<sub>477</sub>); C. eGFP-Linker-CBD(Y<sub>478</sub>); D.

eGFP-Linker-CBD(Y<sub>477</sub>Y<sub>478</sub>Y<sub>479</sub>); E. eGFP-Linker-CBD(Y<sub>451</sub>); F. eGFP-Linker-CBD(Y<sub>451</sub>Y<sub>452</sub>); G. eGFP-Linker-CBD(Y<sub>451</sub>Y<sub>452</sub>, Y<sub>477</sub>Y<sub>478</sub>Y<sub>479</sub>). The integral optical density value calculated under microscopy is marked on the bottom left.

<https://doi.org/10.1371/journal.pone.0176444.g004>

optical density value reached IDO = 36.0 on the filter paper fibre and IDO = 35.8 on the microcrystalline (Figs 4A and 5A). Comparing the fluorescence intensity between the one point mutant and multi-point mutant revealed that the fluorescence intensity of the three-point mutant (Y<sub>477</sub>Y<sub>478</sub>Y<sub>479</sub>) (Figs 4C and 5C) has a weaker intensity than that of the one point mutant (Y<sub>478</sub>) (Figs 4B and 5B). This result indicated that the binding between the CBD domain and the cellulose substrate not only occurred between the single aromatic amino acids (such as Y<sub>478</sub>) but also that all the aromatic amino acids in the conserved motif might participate in this process. A difference in the affinity between the two conserved aromatic amino acid regions was observed in this assay. A dramatic decline in the green fluorescence intensity was observed in the (Y<sub>451</sub>Y<sub>452</sub>) mutant (Figs 4E and 5E). However, the other two mutants from region II apparently have a lighter declined range of green fluorescence in the mutants of region II. Additionally, the integral optical density of region II was IOD = 22.5–24.6 on the filter paper fibre and IOD = 20.7–25.4 on the microcrystalline cellulose (Figs 4B, 4C, 5B and 5C). Thus, conserved region I appears to contribute more to the cellulose binding than the other motif. We further mutated both regions I and II and found that the fluorescence intensity of the mutant was close to that of the motif I mutant and showed a very weak intensity (IDO = 6.2) (Fig 4E and 4F). Thus, further testing revealed that motif I has a larger impact on the function of the CBD.

Adsorption isothermal assays were conducted to quantitatively analyze the binding capacity of CBD and the mutants on cellulosic substrate (Fig 6). As indicated by the figures, the mode of adsorption of CBD and the mutants on the cellulosic substrates proceed in accordance with the Langmuir-type isotherm, could be described by the Langmuir equation:  $A = A_{\max}KE/(1 + KE)$ .  $E$  and  $A$  indicated the concentration of protein in the liquid phase and the amount of adsorbed protein on the substrate, respectively.  $A_{\max}$  and  $K$  are the represent the maximum amount of adsorbed protein and the adsorption equilibrium constant, respectively. The  $A_{\max}$  and  $K$  were determined from the plot of  $1/A$  against  $1/E$ . As shown by Fig 6, the adsorption curves and the parameters, the nature CBD domain has the maximum binding capacity, with  $A_{\max}$  value significantly larger than the mutants. The decline of the  $A_{\max}$  of the mutants (Y<sub>451</sub>, Y<sub>477</sub> and Y<sub>478</sub>) indicated that these three aromatic amino acids participated in the cellulosic substrates binding. While the significant decline of  $A_{\max}$  value of mutants (Y<sub>477</sub>Y<sub>478</sub>Y<sub>479</sub> and Y<sub>451</sub>Y<sub>452</sub>) indicated that aromatic amino acids around these three amino acids might also participated in the binding process of CBD on cellulosic substrate, with the  $A_{\max}$  declined from the original 54.8  $\mu\text{g/g}$  down to 37.5  $\mu\text{g/g}$  and 25.4  $\mu\text{g/g}$  substrates, respectively. Coincided with the observations in above experiments by GFP fluorescence intensity, the Y<sub>451</sub>Y<sub>452</sub> mutant have a more significant decline than the mutant Y<sub>477</sub>Y<sub>478</sub>Y<sub>479</sub>, indicated that Y<sub>451</sub>Y<sub>452</sub> might contribute more to the CBD domain on the binding to the cellulosic substrates than Y<sub>477</sub>Y<sub>478</sub>Y<sub>479</sub> region (Fig 6).

### ITC assays of the affinity of the CBD mutant to cellulose substrates

We subsequently used the ITC assays to quantify the interaction between the CBD mutants and the cellulose substrates. As reflected by the ITC fitting curves (Fig 7A), the binding of CBD and the cellulose substrate conformed to the multi-site binding model ( $n = 3.2$ ) with the related parameters, such as  $Ka = 2.3E4$ ,  $\Delta G = -5.60$ ,  $\Delta H = -7.26$ , and  $T\Delta S = -1.66$ . The binding affinity ( $Ka$  value), the change in the heat of binding ( $\Delta H$ ) and entropy ( $\Delta S$ ) reflected that the binding between CBD and the cellulosic substrates was weaker than the H-band, which



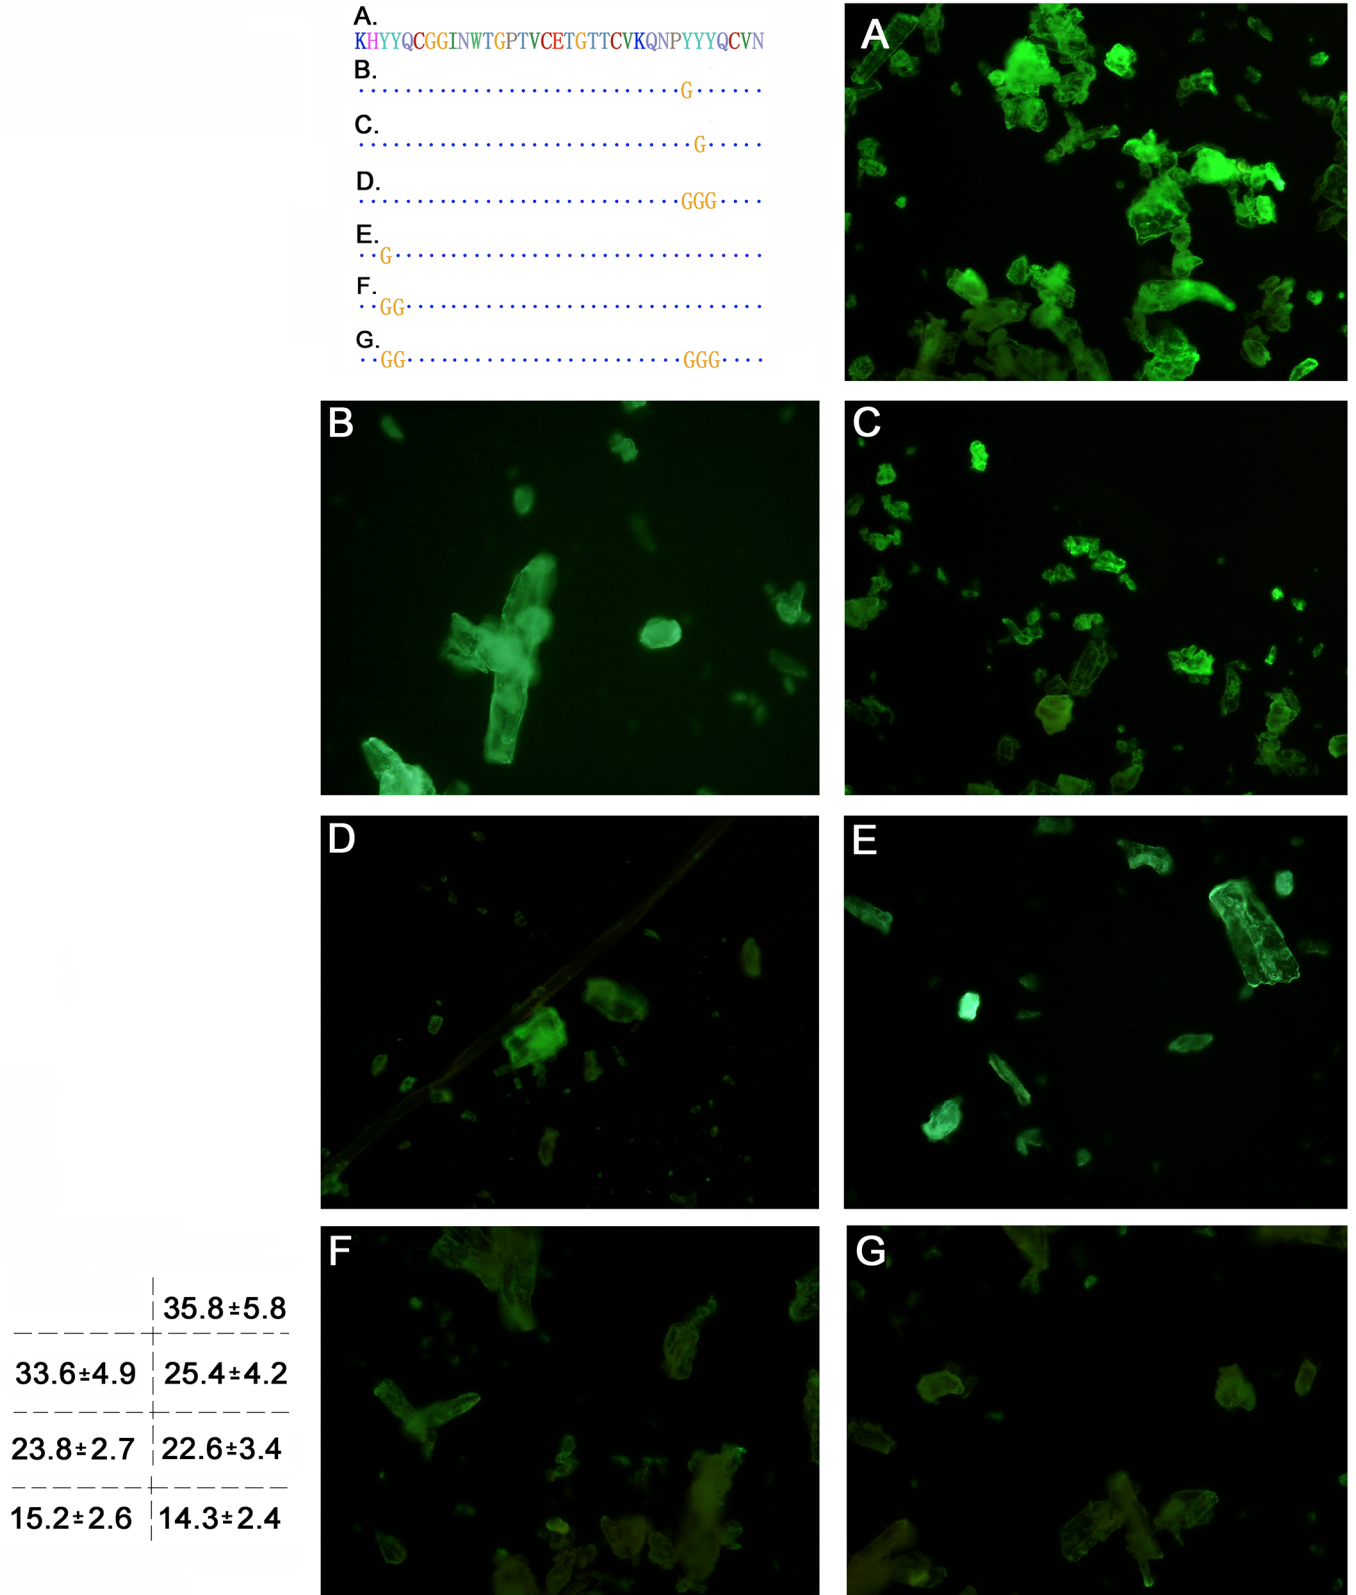

**Fig 5. CBD binding on the microcrystalline cellulose under fluorescence excitation.** A. eGFP-Linker-CBD; B. eGFP-Linker-CBD(Y<sub>477</sub>); C. eGFP-Linker-CBD(Y<sub>478</sub>); D. eGFP-Linker-CBD(Y<sub>477</sub>Y<sub>478</sub>Y<sub>479</sub>); E. eGFP-Linker-CBD(Y<sub>451</sub>); F. eGFP-Linker-CBD(Y<sub>451</sub>Y<sub>452</sub>); G. eGFP-Linker-CBD (Y<sub>451</sub>Y<sub>452</sub>, Y<sub>477</sub>Y<sub>478</sub>Y<sub>479</sub>). The integral optical density value calculated under microscopy is marked on the bottom left.

<https://doi.org/10.1371/journal.pone.0176444.g005>



CBD KHYIQCGGINWVGPTVCETGTTTCVKQNPYYYQCVN  
 M-Y<sub>477</sub> .....G.....  
 M-Y<sub>478</sub> .....G.....  
 M-Y<sub>477-479</sub> .....GGG.....  
 M-Y<sub>451</sub> ..G.....  
 M-Y<sub>451-452</sub> ..GG.....  
 M-Y<sub>451-452-Y<sub>477-479</sub></sub> ..GG.....GGG.....

Parameters in adsorption of CBD and mutants on cellulosic substrate

|                         | CBD  | M-Y <sub>477</sub> | M-Y <sub>478</sub> | M-Y <sub>477-479</sub> | M-Y <sub>451</sub> | M-Y <sub>451-452</sub> | M-Y <sub>451-452-Y<sub>477-479</sub></sub> |
|-------------------------|------|--------------------|--------------------|------------------------|--------------------|------------------------|--------------------------------------------|
| A <sub>max</sub> (ug/g) | 54.8 | 45.2               | 42.1               | 37.5                   | 29.2               | 25.4                   | 11.9                                       |
| K (ug/ml)               | 12.5 | 32.6               | 43.3               | 64.5                   | 98.4               | 102.3                  | 126.5                                      |

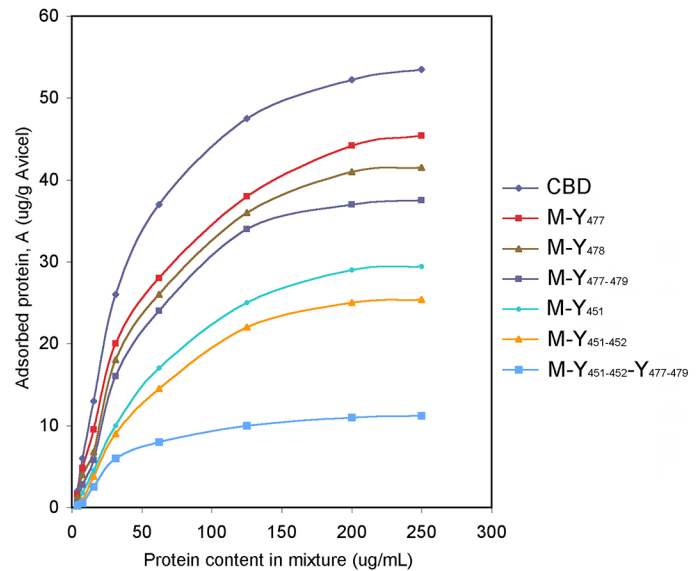

**Fig 6. Adsorption isotherms of CBD and mutants onto the microcrystalline cellulose and their corresponding reciprocal Langmuir parameters.** Protein content loaded into the mixture changed from 2 µg/mL to 250 µg/mL.

<https://doi.org/10.1371/journal.pone.0176444.g006>

generally has the higher heat of binding and entropy (>2 kcal/mol per hydrogen bond) [18]. Thus, the weak interaction between the CBD and the cellulose was caused by the secondary bonds.

The deletion of aromatic amino acids weakened the affinity of CBD to cellulose, which was evidenced by the ITC curves of all the mutants (Fig 7B–7E). The deletions of Y<sub>451</sub>-Y<sub>452</sub>, Y<sub>478</sub>, and Y<sub>477</sub>-Y<sub>478</sub>-Y<sub>479</sub> have all shown a significant decrease in the *K<sub>a</sub>*,  $\Delta H$  and  $\Delta S$  values. According to previous studies [17], amino acids Y<sub>451</sub>, W<sub>477</sub>, Y<sub>478</sub> might be found on the flat face of the three-dimensional structure of CBD and directly contact the cellulose substrates. Our results further supported that these aromatic amino acids participate in the interaction and binding between the CBD domain and cellulose substrates.

The difference in these motifs in the affinity and binding strength was also evidenced by the ITC assays on these mutants. The mutation of residues Y<sub>451</sub>-Y<sub>452</sub> greatly diminished the affinity between CBD and cellulose. As reflected by Fig 7D, there was no detectable interaction observed in this ITC assay. Similar phenomena also occurred on the Y<sub>451</sub>-Y<sub>452</sub> and Y<sub>477</sub>-Y<sub>478</sub>-Y<sub>479</sub> simultaneously mutated protein; no interaction occurred between the protein and substrate (Fig 7E). Thus, compared with the Y<sub>477</sub>-Y<sub>478</sub>-Y<sub>479</sub> region, Y<sub>451</sub>-Y<sub>452</sub> contributed more to the affinity between CBD and cellulose.

### Structural modelling of the CBD domain of cellulose

Currently, 3-D structures of the representatives of various CBD families have been gradually constructed using methods, such as crystallography or nuclear magnetic resonance techniques. As reflected by the structure of the well-characterized *T. reesei* CBD, three aromatic amino acids on the flat face of CBD were important for the binding of CBD to the cellulosic substrate through the secondary bond interaction between the aromatic amino acids and the glucose ring unit of the cellulose molecules [7, 10]. Structural modelling of the CBD domain revealed that, similar to the *T. reesei* cellulase, the *P. crustosum* endoglucanase EGL1 CBD domain structurally has a typical flat face, and three aromatic amino acids Y<sub>451</sub>, Y<sub>477</sub>, and Y<sub>478</sub> are on this flat face (Fig 8A). This result shows that a mutation of Y<sub>451</sub> and Y<sub>477</sub> could affect the

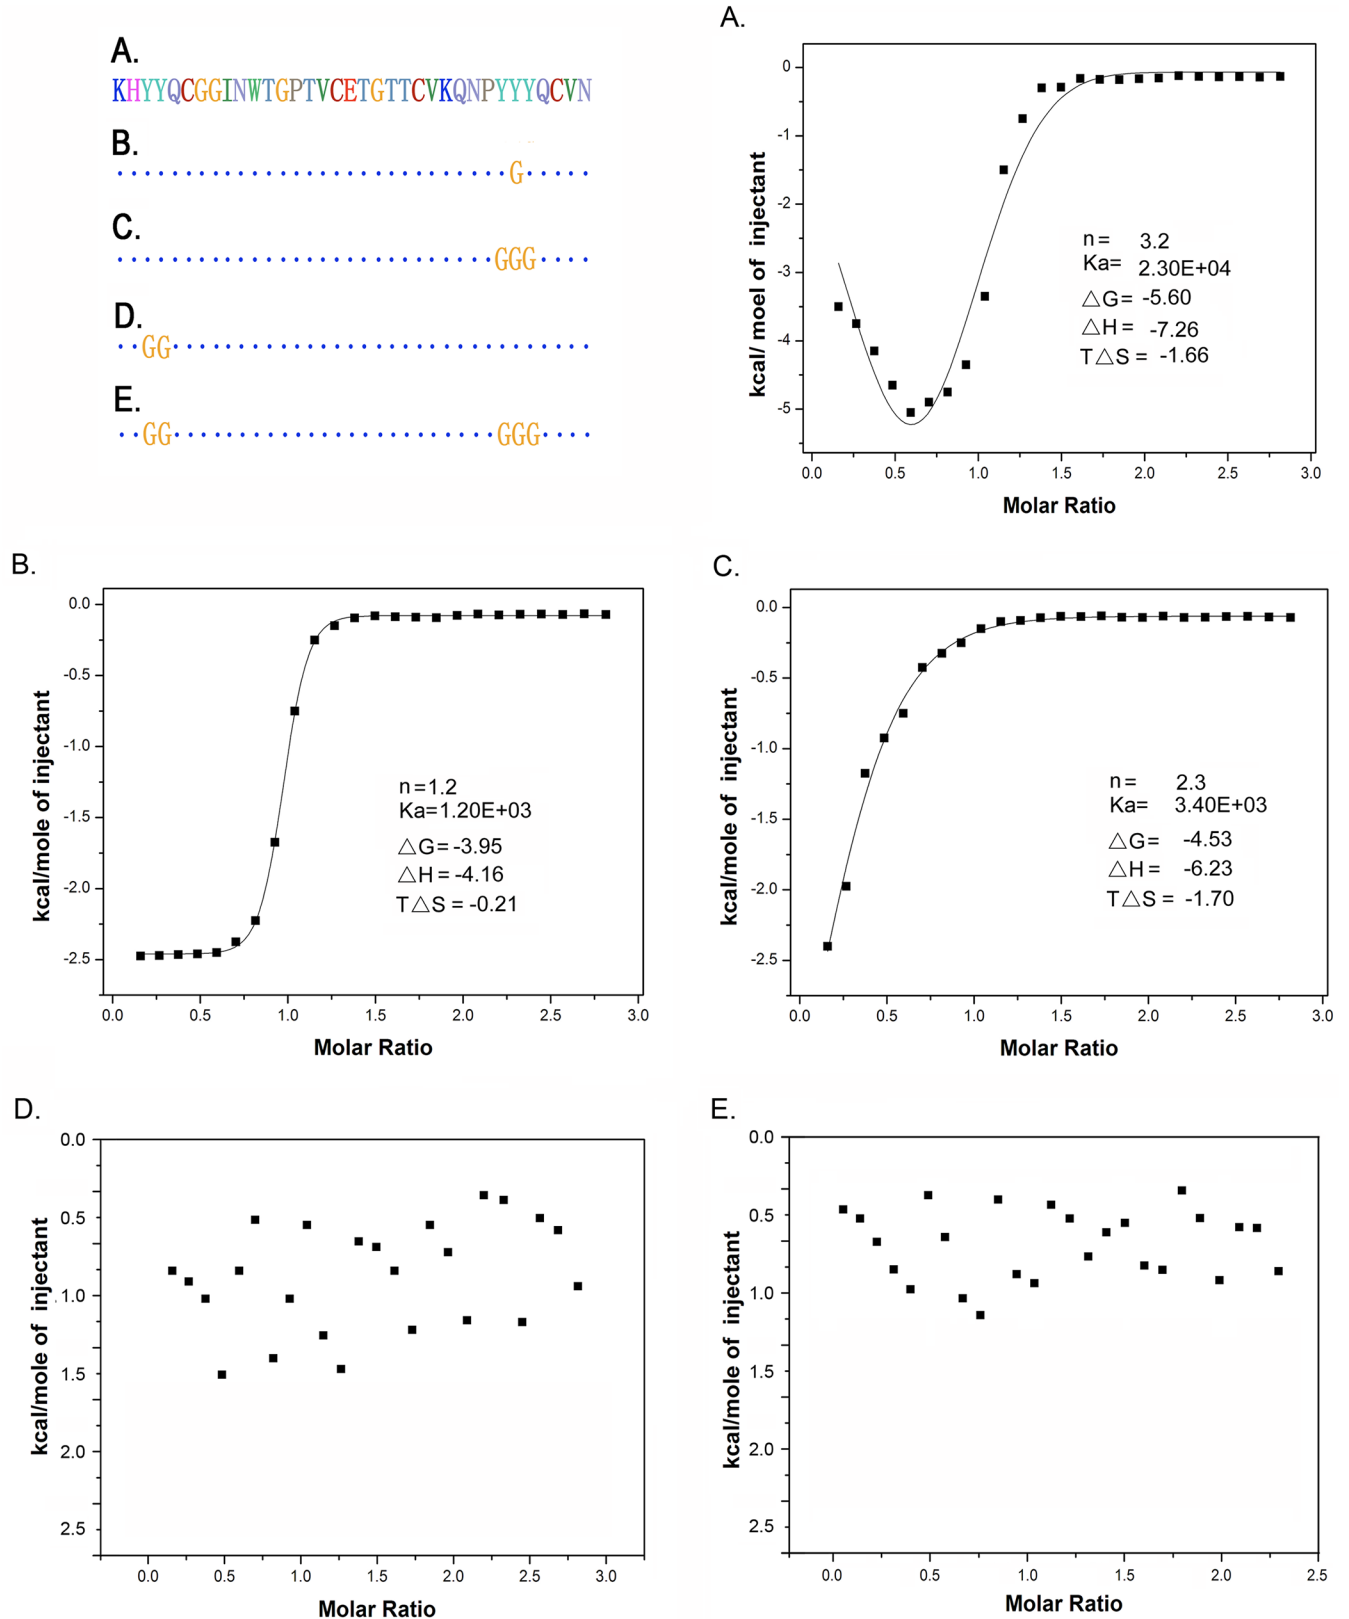

**Fig 7. ITC assay to analyse the interactions between various CBD domains and cellobiose.** The mutant proteins were titrated into cellobiose. The experimental parameters were set as a total 28 injections, a cell temperature of 25 °C, initial delay of 180 sec, syringe length of

0.241 mM, cell 0.022 mM, and stirring speed of 300. The injection parameters were a volume of 10  $\mu$ l, a duration of 20 sec, a spacing of 180 sec, and a filter period of 2 sec. (A) Original CBD protein; (B) Point mutation of residues  $W_{459}$  in motif II; (C) Mutation of residues  $Y_{477}Y_{478}Y_{479}$  in motif III; (D) Mutation of  $Y_{451}Y_{452}$  in motif I; (E) Mutation of  $Y_{451}Y_{452}$  and  $Y_{477}Y_{478}Y_{479}$  both in motif I and III.

<https://doi.org/10.1371/journal.pone.0176444.g007>

binding of CBD to the cellulosic substrates. However, the mechanism underlying the difference in affinity between the  $Y_{451}Y_{452}$  mutant and  $Y_{477}Y_{478}Y_{479}$  mutants to cellulosic substrates remains unclear. As reported previously, the cellulosic binding occurred not only between the aromatic amino acids of CBD and the cellulosic substrate; some amino acids, such as tyrosine and glutamine, might have also participated in this interaction process. The studies by Mattinen et al. [17] and McLean et al. [9] have also confirmed that glutamine and asparagine might participate in this process. Thus, it is possible that the interaction between the CBD domain and cellulosic substrates not only occurred on the aromatic amino acids on the flat

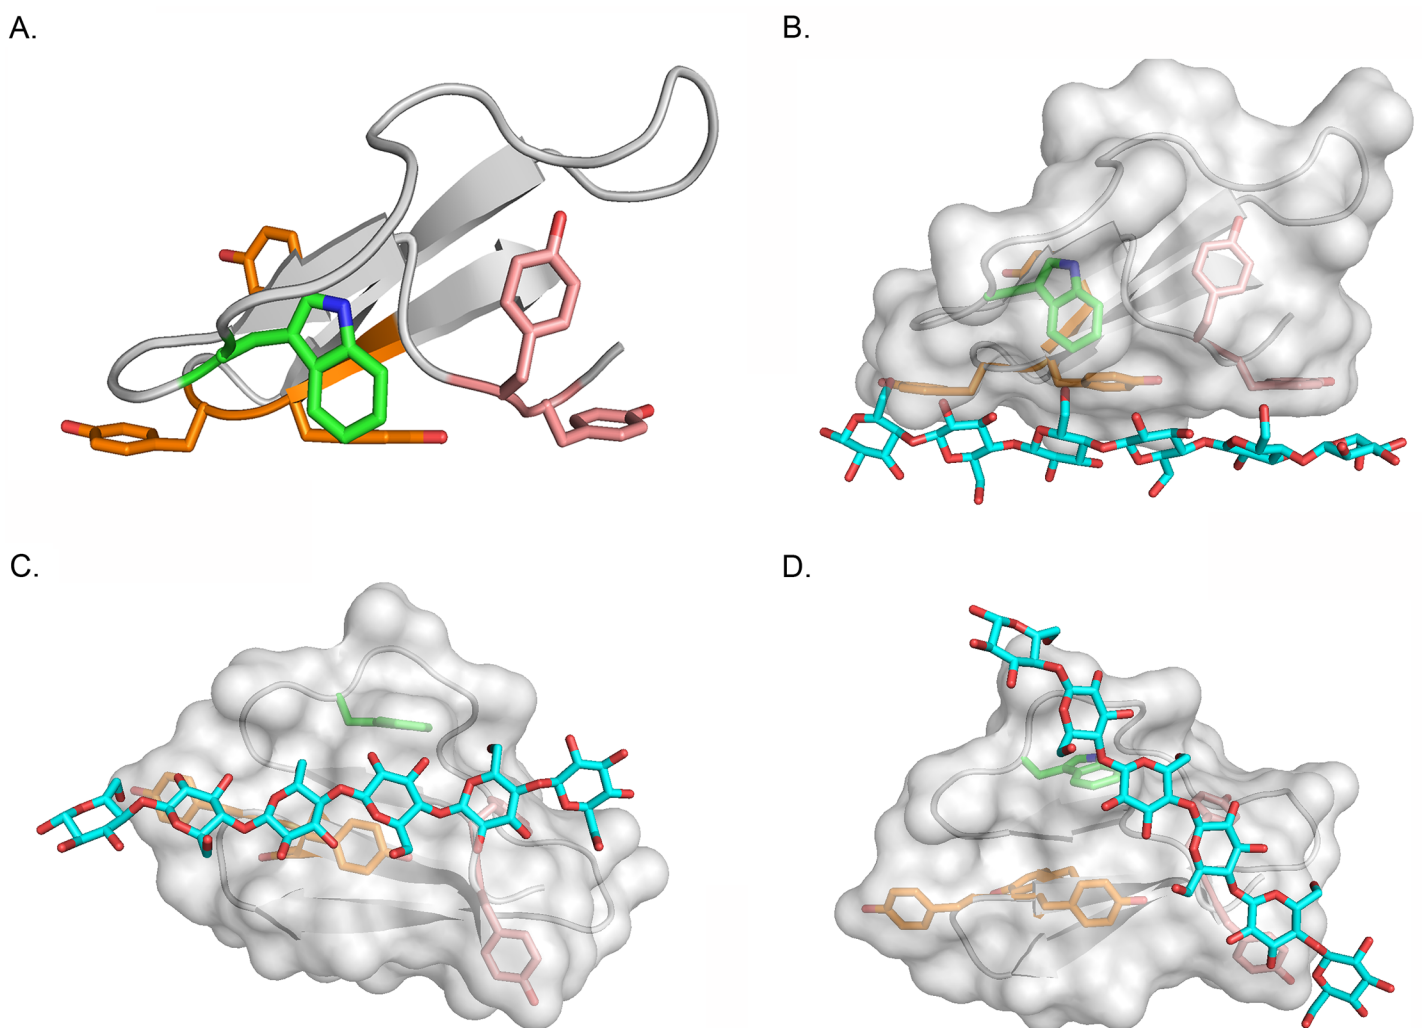

**Fig 8. Structure model of the CBD domain of *P. crustosum* endoglucanase EGL1 and putative substrate-binding models.** (A) Cartoon presentation of the 3-dimension model of CBD. The putative residues critically important for substrate binding are presented as sticks. The carbon atoms of aromatic residues situated in the first ( $Y_{451}$ ,  $Y_{452}$ ), middle ( $W_{459}$ ), and last ( $Y_{477}$ ,  $Y_{478}$ ,  $Y_{479}$ ) regions are presented in pink, green, and orange, respectively. (B) As in (A), the transparent surface of CBD is shown, and a celohexose molecule is docked to three aromatic residues  $Y_{451}/Y_{477}/Y_{478}$  arranged in a linear mode manually. (C) As in (B), for  $Y_{452}/Y_{477}/Y_{478}$ . (D) As in (B or C), for  $Y_{451}/Y_{452}/W_{459}$ .

<https://doi.org/10.1371/journal.pone.0176444.g008>

face; some other amino acids, such as glutamine, in or outside the flat face might also participate in the interaction. According to the 3-D structural model of the EGL CBD domain, the flexible poly-glucose molecule could also contact not only Y<sub>451</sub>, Y<sub>477</sub>, and Y<sub>478</sub> as the typical model (Fig 8B) but also Y<sub>452</sub>, Y<sub>477</sub>, and Y<sub>478</sub> (Fig 8C). Thus, the Y<sub>452</sub> could participate in the affinity to the cellulosic substrate. Moreover, two aromatic amino acids, Y<sub>452</sub> and W<sub>459</sub>, are found on the lateral surface of CBD together. The lateral surface of CBD might also contact the cellulosic substrates (Fig 8D). Thus, it is possible that the conserved Y<sub>451</sub>-Y<sub>452</sub> in region I of CBD might have a higher chance of contacting the cellulosic substrates, contributing more to the affinity of CBD than the other amino acids.

## Conclusions

The cellulose binding domain (CBD) of the newly cloned *P. crustosum* endoglucanase EGL1 phylogenetically represented a group divergent from the well-characterized *T. reesei* CBD domain. Two aromatic-amino-acid-rich motifs that are structurally located on a flat face of the CBD domain all contributed to the CBD binding on the cellulose, and motif I showed a higher affinity for the binding of CBD on cellulose substrates. It is possible that the interaction between the CBD domain and cellulosic substrates not only occurred on the aromatic amino acids on the flat face; some other amino acids, in or outside the flat face might also participate in the interaction. Thus, the conserved Y<sub>451</sub>-Y<sub>452</sub> might have a higher chance of contacting the cellulosic substrates, contributing more to the affinity of CBD than the other amino acids. This finding might be a reference for enzymatic characterization of cellulase and their application in the biodegradation of cellulosic materials.

## Acknowledgments

We thank Prof. Li YG, Dr. Lei L at Huazhong Agricultural University for their help with the confocal and microscopy analyses. Dr. Yang JK is an incumbent of the Chutian Scholar Fellowship.

## Author Contributions

**Conceptualization:** JKY.

**Data curation:** JKY WX ZGH.

**Formal analysis:** JKY ZGH.

**Funding acquisition:** JKY.

**Investigation:** JKY WX FYC LX.

**Methodology:** JKY ZGH.

**Project administration:** JKY.

**Resources:** JKY.

**Software:** JKY ZGH.

**Supervision:** JKY.

**Validation:** JKY WX.

**Visualization:** JKY WX FYC.

**Writing – original draft:** JKY ZGH.

Writing – review & editing: JKY.

## References

1. Lynd LR, Cushman JH, Nichols RJ, Wyman CE. Fuel ethanol from cellulosic biomass. *Science* 1991; 251: 1318–1323. <https://doi.org/10.1126/science.251.4999.1318> PMID: 17816186
2. Lynd LR, Weimer PJ, van Zyl WH, Pretorius IS microbial cellulose utilization: fundamentals and biotechnology. *Microbiol Mol Biol Rev.* 2002; 66: 506–577. <https://doi.org/10.1128/MMBR.66.3.506-577.2002> PMID: 12209002
3. Sharma A, Tewari R, Rana SS, Soni R, Soni SK. Cellulases: classification, methods of determination and industrial applications. *Appl Biochem Biotechnol.* 2016; 179: 1346–1380. <https://doi.org/10.1007/s12010-016-2070-3> PMID: 27068832
4. Tilbeurgh HV, Tomme P, Claeysens M, Bhikhabhai R, Pettersson G. Limited proteolysis of the cellobiohydrolase I from *Trichoderma reesei*: Separation of functional domains. *FEBS Lett.* 1986; 204(2): 223–227.
5. Ohmiya K, Sakka K, Karita S, Kimura T. Structure of cellulases and their applications. *Biotechnol Genet Eng Rev.* 1997; 14: 365–414. PMID: 9188160
6. Tomme P, Van Tilbeurgh H, Pettersson G, Van Damme J, Vandekerckhove J, Knowles J, et al. Studies of the cellulolytic system of *Trichoderma reesei* QM 9414. analysis of domain function in two cellobiohydrolases by limited proteolysis. *Eur J Biochem.* 1988; 170: 575–581. PMID: 3338453
7. Kormos J, Johnson PE, Brun E, Tomme P, McIntosh LP, Haynes CA, et al. Binding site analysis of cellulose binding domain CBD(N1) from endoglucanase C of *Cellulomonas fimi* by site-directed mutagenesis. *Biochemistry* 2000; 39: 8844–8852. PMID: 10913296
8. Carrard G, Koivula A, Söderlund H, Béguin P. Cellulose-binding domains promote hydrolysis of different sites on crystalline cellulose. *Proc Natl Acad Sci U S A.* 2000; 97: 10342–10347. <https://doi.org/10.1073/pnas.160216697> PMID: 10962023
9. McLean BW, Bray MR, Boraston AB, Gilkes NR, Haynes CA, Kilburn DG. Analysis of binding of the family 2a carbohydrate binding module from *Cellulomonas fimi* xylanase 10A to cellulose: specificity and identification of functionally important amino acid residues. *Protein Eng.* 2000; 13: 801–809. PMID: 11161112
10. Takashima S, Ohno M, Hidaka M, Nakamura A, Masaki H, Uozumi T. Correlation between cellulose binding and activity of cellulose-binding domain mutants of *Humicola grisea* cellobiohydrolase 1. *FEBS Lett.* 2007; 581: 5891–5896. <https://doi.org/10.1016/j.febslet.2007.11.068> PMID: 18061578
11. Ho SN, Hunt HD, Horton RM, Pullen JK, Pease LR. Pease Site-directed mutagenesis by overlap extension using the polymerase chain reaction. *Gene* 1989; 77: 51–59. PMID: 2744487
12. Biasini M, Bienert S, Waterhouse A, Arnold K, Studer G, Schmidt T, et al. SWISS-MODEL: modelling protein tertiary and quaternary structure using evolutionary information. *Nucleic Acids Res.* 2014; 42: W252–258. <https://doi.org/10.1093/nar/gku340> PMID: 24782522
13. Happs RM, Guan X, Resch MG, Davis MF, Beckham GT, Tan Z, et al. O-glycosylation effects on family 1 carbohydrate-binding module solution structures. *FEBS J.* 2015; 282: 4341–4356. <https://doi.org/10.1111/febs.13500> PMID: 26307003
14. Chen VB, Arendall WB, Headd JJ, Keedy DA, Immormino RM, Kapral GJ, et al. MolProbity: all-atom structure validation for macromolecular crystallography. *Acta Crystallogr D Biol Crystallogr.* 2010; 66: 12–21. <https://doi.org/10.1107/S0907444909042073> PMID: 20057044
15. Arai T, Araki R, Tanaka A, Karita S, Kimura T, Sakka K, et al. Characterization of a cellulase containing a family 30 carbohydrate-binding module (CBM) derived from *Clostridium thermocellum* CelJ: importance of the CBM to cellulose hydrolysis. *J Bacteriol.* 2003; 185: 504–512. <https://doi.org/10.1128/JB.185.2.504-512.2003> PMID: 12511497
16. Ciolacu D, Kovac J, Kokol V. The effect of the cellulose-binding domain from *Clostridium cellulovorans* on the supramolecular structure of cellulose fibers. *Carbohydr Res.* 2010; 345: 621–630. <https://doi.org/10.1016/j.carres.2009.12.023> PMID: 20122684
17. Mattinen ML, Kontteli M, Kerovuori J, Linder M, Annala A, Lindeberg G, et al. Three-dimensional structures of three engineered cellulose-binding domains of cellobiohydrolase I from *Trichoderma reesei*. *Protein Sci.* 1997; 6: 294–303. <https://doi.org/10.1002/pro.5560060204> PMID: 9041630
18. Schreiber G. Kinetic studies of protein-protein interactions. *Curr Opin Struct Biol.* 2002; 12: 41–47.
19. Kimura M. A simple method for estimating evolutionary rates of base substitutions through comparative studies of nucleotide sequences. *J Mol Evol.* 1980; 16: 111–120. PMID: 7463489

20. Tamura K, Dudley J, Nei M, Kumar S. MEGA4: Molecular evolutionary genetics analysis (MEGA) software version 4.0. *Mol Biol Evol.* 2007; 24: 1596–1599. <https://doi.org/10.1093/molbev/msm092> PMID: [17488738](https://pubmed.ncbi.nlm.nih.gov/17488738/)
